# Supplementary material for: Immobilization of enzymes on an organic–inorganic hybrid network consisting of Dawson-type polyoxotungstate and a zinc(ii)-biimidazole complex moiety
Source: Royal Society of Chemistry journal article supplement (doi:10.1039/c8nj03776k), 2018-11-13
Supplement: c8nj03776k1.pdf [file c8nj03776k1.pdf]

## Supporting Information

# Immobilization of enzyme on an organic-inorganic hybrid network consisting of Dawson-type polyoxotungstate and zinc(II)-biimidazole complex Moiety

Hao-Tian Zhu<sup>a</sup>, Jing Du<sup>a</sup>, Ying Lu<sup>b</sup>, Fang Su<sup>b</sup>, and Yangguang Li<sup>\*a</sup>

### Contents

=====

|                                                               |            |
|---------------------------------------------------------------|------------|
| 1. Crystal structure figures .....                            | Page 2-3   |
| 2. Selected bond lengths and angles of compounds 1 and 2..... | Page 4-8   |
| 3. Physical characterizations .....                           | Page 9     |
| 4. Enzyme immobilization and characterization.....            | Page 10-13 |

=====

## 1. Crystal structure figures

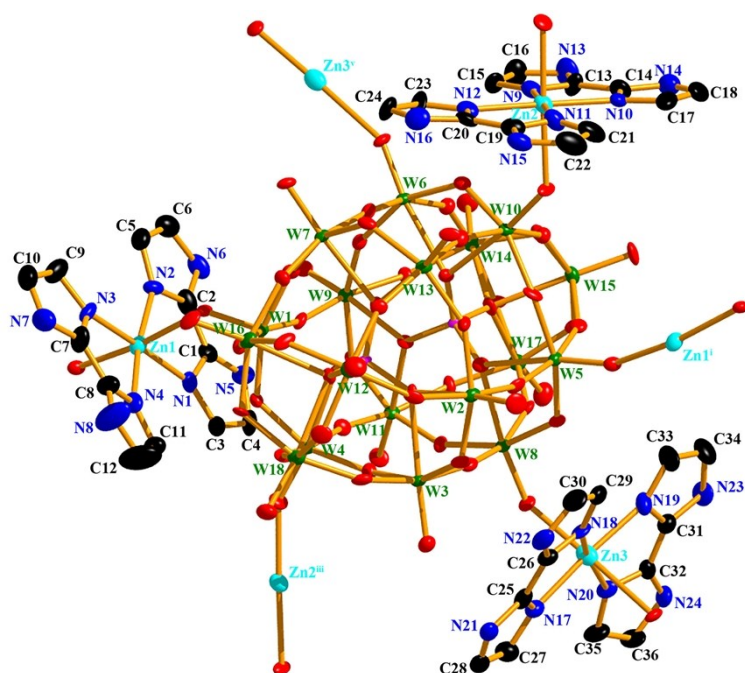

**Fig. S1** ORTEP view of the asymmetric unit of compound **1** with atom labeling (30 % probability displacement ellipsoids; Hydrogen atoms and water molecules have been omitted for clarity)

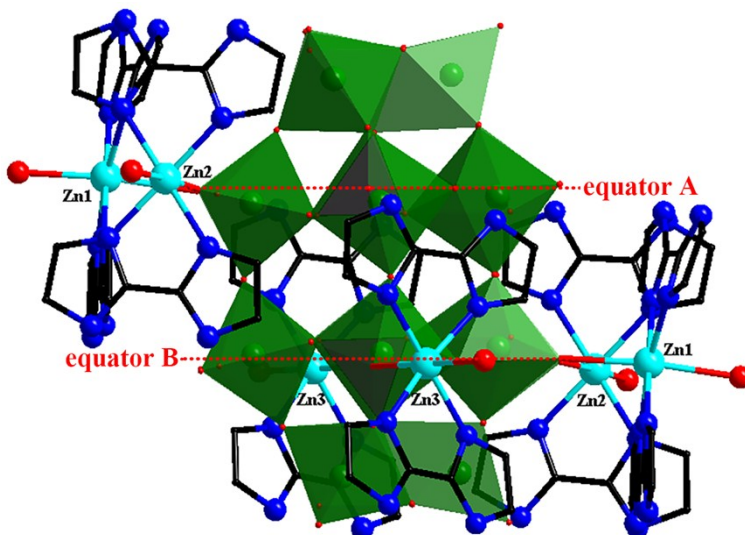

**Fig. S2** Connection mode between Dawson-type POM and six Zn-H<sub>2</sub>biim coordination units in compound **1**



## 2. Selected bond lengths and angles of compounds 1 and 2

Table S1 Selected bond lengths (Å) and angles (°) for compound 1

| Bond   | Length(Å) | Bond    | Length(Å) | Bond      | Length(Å) |
|--------|-----------|---------|-----------|-----------|-----------|
| W1-O59 | 1.724(9)  | W8-O26  | 1.912(11) | W16-O56   | 1.723(10) |
| W1-O29 | 1.882(10) | W8-O16  | 1.916(9)  | W16-O60   | 1.890(11) |
| W1-O23 | 1.909(10) | W8-O53  | 2.370(9)  | W16-O13   | 1.927(9)  |
| W1-O2  | 1.921(9)  | W9-O49  | 1.707(10) | W16-O10   | 1.927(9)  |
| W1-O60 | 1.925(11) | W9-O23  | 1.889(10) | W16-O58   | 1.950(10) |
| W1-O8  | 2.346(9)  | W9-O20  | 1.913(9)  | W16-O36   | 2.392(9)  |
| W2-O46 | 1.692(10) | W9-O9   | 1.914(10) | W17-O44   | 1.698(12) |
| W2-O43 | 1.892(9)  | W9-O62  | 1.915(9)  | W17-O21   | 1.908(8)  |
| W2-O40 | 1.894(10) | W9-O11  | 2.383(9)  | W17-O27   | 1.913(10) |
| W2-O32 | 1.915(9)  | W10-O5  | 1.711(9)  | W17-O1    | 1.913(10) |
| W2-O47 | 1.965(11) | W10-O24 | 1.878(10) | W17-O45   | 1.913(10) |
| W2-O12 | 2.396(9)  | W10-O31 | 1.886(11) | W17-O28   | 2.398(10) |
| W3-O42 | 1.702(10) | W10-O4  | 1.899(9)  | W18-O22   | 1.735(10) |
| W3-O26 | 1.891(11) | W10-O50 | 1.937(10) | W18-O54   | 1.891(10) |
| W3-O52 | 1.899(10) | W10-O55 | 2.356(9)  | W18-O34   | 1.897(10) |
| W3-O43 | 1.908(10) | W11-O39 | 1.701(10) | W18-O19   | 1.917(10) |
| W3-O54 | 1.962(10) | W11-O7  | 1.896(10) | W18-O10   | 1.919(10) |
| W3-O12 | 2.387(9)  | W11-O62 | 1.896(9)  | W18-O36   | 2.367(9)  |
| W4-O38 | 1.732(9)  | W11-O6  | 1.920(9)  | P1-O55    | 1.525(10) |
| W4-O52 | 1.881(9)  | W11-O21 | 1.923(9)  | P1-O11    | 1.528(9)  |
| W4-O2  | 1.887(9)  | W11-O11 | 2.365(9)  | P1-O53    | 1.547(10) |
| W4-O7  | 1.901(10) | W12-O35 | 1.718(12) | P1-O28    | 1.592(10) |
| W4-O34 | 1.930(10) | W12-O58 | 1.896(9)  | P2-O12    | 1.505(9)  |
| W4-O8  | 2.366(9)  | W12-O15 | 1.904(9)  | P2-O51    | 1.519(10) |
| W5-O57 | 1.721(9)  | W12-O19 | 1.922(10) | P2-O8     | 1.534(10) |
| W5-O47 | 1.834(10) | W12-O40 | 1.947(10) | P2-O36    | 1.580(10) |
| W5-O4  | 1.896(10) | W12-O36 | 2.398(10) | Zn1-O57#1 | 2.182(9)  |
| W5-O16 | 1.896(9)  | W13-O37 | 1.689(9)  | Zn1-O59   | 2.314(9)  |
| W5-O41 | 1.965(11) | W13-O32 | 1.866(9)  | Zn1-N1    | 2.095(14) |
| W5-O53 | 2.336(9)  | W13-O31 | 1.912(11) | Zn1-N2    | 2.125(13) |
| W6-O61 | 1.710(9)  | W13-O15 | 1.917(9)  | Zn1-N3    | 2.067(14) |
| W6-O9  | 1.878(9)  | W13-O14 | 1.941(10) | Zn1-N4    | 2.159(15) |
| W6-O33 | 1.892(11) | W13-O51 | 2.402(9)  | Zn2-O38#2 | 2.209(10) |
| W6-O24 | 1.920(10) | W14-O48 | 1.686(10) | Zn2-O5    | 2.323(9)  |
| W6-O18 | 1.943(10) | W14-O18 | 1.885(10) | Zn2-N9    | 2.096(16) |
| W6-O55 | 2.408(9)  | W14-O25 | 1.898(9)  | Zn2-N10   | 2.116(13) |
| W7-O3  | 1.710(9)  | W14-O20 | 1.950(9)  | Zn2-N11   | 2.101(15) |
| W7-O33 | 1.904(10) | W14-O1  | 1.972(10) | Zn2-N12   | 2.125(13) |

|        |           |         |           |         |           |
|--------|-----------|---------|-----------|---------|-----------|
| W7-O14 | 1.907(10) | W14-O28 | 2.375(9)  | Zn3-O30 | 2.267(10) |
| W7-O13 | 1.913(9)  | W15-O17 | 1.733(9)  | Zn3-O61 | 2.566(10) |
| W7-O29 | 1.926(10) | W15-O41 | 1.873(10) | Zn3-N17 | 2.117(13) |
| W7-O51 | 2.351(9)  | W15-O50 | 1.889(10) | Zn3-N18 | 2.025(14) |
| W8-O30 | 1.726(9)  | W15-O45 | 1.936(11) | Zn3-N19 | 2.162(14) |
| W8-O6  | 1.878(9)  | W15-O25 | 1.948(10) | Zn3-N20 | 2.073(13) |
| W8-O27 | 1.910(10) | W15-O28 | 2.368(8)  |         |           |

| Bond       | Angle(°) | Bond        | Angle(°) | Bond          | Angle(°) |
|------------|----------|-------------|----------|---------------|----------|
| O59-W1-O29 | 104.5(4) | O27-W8-O26  | 162.9(4) | O56-W16-O60   | 102.0(5) |
| O59-W1-O23 | 98.7(4)  | O6-W8-O16   | 156.9(4) | O56-W16-O13   | 101.9(4) |
| O29-W1-O2  | 156.7(4) | O49-W9-O23  | 98.8(4)  | O13-W16-O10   | 156.3(4) |
| O23-W1-O60 | 164.6(4) | O23-W9-O20  | 163.3(4) | O60-W16-O58   | 156.6(4) |
| O46-W2-O43 | 101.0(5) | O49-W9-O9   | 102.9(4) | O44-W17-O21   | 103.7(5) |
| O46-W2-O40 | 99.5(5)  | O9-W9-O62   | 157.5(4) | O21-W17-O27   | 85.1(4)  |
| O43-W2-O32 | 156.3(4) | O5-W10-O24  | 99.5(4)  | O27-W17-O1    | 156.4(4) |
| O40-W2-O47 | 161.5(4) | O5-W10-O31  | 98.4(5)  | O44-W17-O28   | 170.7(4) |
| O42-W3-O26 | 98.4(5)  | O24-W10-O4  | 156.8(4) | O22-W18-O54   | 103.1(4) |
| O42-W3-O52 | 103.1(5) | O31-W10-O50 | 164.5(4) | O22-W18-O34   | 103.9(5) |
| O52-W3-O43 | 156.5(4) | O39-W11-O7  | 100.3(4) | O34-W18-O19   | 156.8(4) |
| O26-W3-O54 | 165.5(4) | O39-W11-O62 | 99.2(4)  | O54-W18-O10   | 158.7(4) |
| O38-W4-O52 | 103.6(4) | O62-W11-O6  | 157.4(4) | N3-Zn1-N1     | 177.0(5) |
| O38-W4-O2  | 100.0(4) | O7-W11-O21  | 163.1(4) | N3-Zn1-N2     | 103.3(5) |
| O38-W4-O7  | 99.6(5)  | O35-W12-O58 | 99.8(5)  | N3-Zn1-O57#1  | 89.9(4)  |
| O7-W4-O34  | 164.9(4) | O58-W12-O15 | 90.5(4)  | O57#1-Zn1-O59 | 171.1(3) |
| O57-W5-O47 | 98.3(4)  | O15-W12-O19 | 154.4(4) | N9-Zn2-N11    | 179.2(5) |
| O57-W5-O4  | 103.6(4) | O35-W12-O36 | 171.6(4) | N9-Zn2-N10    | 80.0(5)  |
| O57-W5-O16 | 97.6(4)  | O37-W13-O32 | 103.0(4) | N9-Zn2-O38#2  | 88.7(5)  |
| O47-W5-O41 | 163.7(4) | O37-W13-O31 | 100.4(4) | O38#2-Zn2-O5  | 177.4(4) |
| O61-W6-O9  | 103.8(4) | O31-W13-O15 | 161.8(4) | N18-Zn3-N20   | 166.4(5) |
| O61-W6-O33 | 100.0(5) | O32-W13-O14 | 157.3(4) | N18-Zn3-N17   | 81.9(5)  |
| O9-W6-O24  | 154.8(4) | O48-W14-O18 | 104.6(5) | N18-Zn3-O30   | 96.0(4)  |
| O33-W6-O18 | 162.9(4) | O18-W14-O25 | 91.8(4)  | O30-Zn3-O61   | 178.3(4) |
| O3-W7-O33  | 98.6(4)  | O25-W14-O20 | 156.1(4) | O55-P1-O11    | 112.8(5) |
| O3-W7-O14  | 97.1(4)  | O48-W14-O28 | 168.7(4) | O11-P1-O53    | 110.9(5) |
| O33-W7-O13 | 164.1(4) | O17-W15-O41 | 103.2(5) | O55-P1-O28    | 106.3(5) |
| O3-W7-O51  | 171.5(4) | O17-W15-O50 | 105.5(5) | O12-P2-O51    | 111.1(5) |
| O30-W8-O6  | 103.5(4) | O50-W15-O45 | 156.8(4) | O12-P2-O36    | 106.6(5) |
| O30-W8-O27 | 98.4(4)  | O17-W15-O25 | 157.1(4) | O8-P2-O36     | 106.8(5) |

Symmetry transformations used to generate equivalent atoms: #1 x-1, y-1, z; #2 x, y+1, z

**Table S2** Hydrogen bonds for compound **1**

| D-H...A          | d(D-H) | d(H...A) | d(D...A)  | <(DHA) |
|------------------|--------|----------|-----------|--------|
| N5-H5A...O3W     | 0.86   | 2.27     | 3.08(2)   | 155.3  |
| N5-H5A...O44#4   | 0.86   | 2.44     | 2.940(19) | 117.2  |
| N6-H6A...O3W     | 0.86   | 2.16     | 2.97(2)   | 155.8  |
| N7-H7A...O22#5   | 0.86   | 2.33     | 3.10(2)   | 149.3  |
| N7-H7A...O4W#5   | 0.86   | 2.65     | 3.20(2)   | 123.3  |
| N8-H8A...O22#5   | 0.86   | 2.25     | 2.06(2)   | 156.0  |
| N8-H8A...O10#5   | 0.86   | 2.57     | 3.19(2)   | 129.2  |
| N13-H13A...O1#6  | 0.86   | 2.00     | 2.790(19) | 152.3  |
| N13-H13A...O48#6 | 0.86   | 2.61     | 3.21(2)   | 128.1  |
| N14-H14A...O1W   | 0.86   | 2.15     | 2.91(2)   | 147.5  |
| N15-H15A...O5W   | 0.86   | 1.96     | 2.81(2)   | 168.5  |
| N16-H16A...O56#7 | 0.86   | 2.16     | 2.909(19) | 145.2  |
| N21-H21A...O2W   | 0.86   | 2.10     | 2.95(2)   | 170.0  |
| N22-H22A...O35#8 | 0.86   | 2.23     | 2.871(19) | 131.2  |
| N23-H23A...O17#9 | 0.86   | 2.33     | 3.088(19) | 147.5  |
| N23-H23A...O45#9 | 0.86   | 2.38     | 3.021(16) | 131.4  |
| N24-H24A...O17#9 | 0.86   | 1.96     | 2.791(16) | 161.0  |

Symmetry transformations used to generate equivalent atoms: #4 -x+1, -y, -z; #5 -x+1, -y, -z+1; #6 -x+1, -y+1, -z; #7 -x+1, -y+1, -z+1; #8 -x+2, -y+1, -z+1; #9 -x+2, -y+1, -z

**Table S3** Selected bond lengths (Å) and angles (°) for compound **2**

| Bond   | Length(Å) | Bond    | Length(Å) | Bond    | Length(Å) |
|--------|-----------|---------|-----------|---------|-----------|
| W1-O43 | 1.715(11) | W7-O62  | 1.887(11) | W14-O25 | 1.692(12) |
| W1-O51 | 1.911(12) | W7-O28  | 1.936(12) | W14-O54 | 1.880(11) |
| W1-O6  | 1.921(12) | W7-O44  | 2.351(11) | W14-O26 | 1.912(10) |
| W1-O58 | 1.925(11) | W8-O29  | 1.692(12) | W14-O59 | 1.918(10) |
| W1-O22 | 1.932(12) | W8-O42  | 1.901(11) | W14-O23 | 1.936(12) |
| W1-O4  | 2.375(11) | W8-O11  | 1.907(12) | W14-O10 | 2.390(11) |
| W2-O7  | 1.708(12) | W8-O3   | 1.911(12) | W15-O34 | 1.714(12) |
| W2-O41 | 1.873(13) | W8-O54  | 1.938(11) | W15-O50 | 1.865(11) |
| W2-O19 | 1.906(11) | W8-O8   | 2.358(11) | W15-O24 | 1.895(12) |
| W2-O62 | 1.908(11) | W9-O27  | 1.693(11) | W15-O26 | 1.909(10) |
| W2-O2  | 1.940(11) | W9-O21  | 1.880(12) | W15-O49 | 1.937(12) |
| W2-O48 | 2.352(11) | W9-O20  | 1.911(11) | W15-O10 | 2.399(10) |
| W3-O38 | 1.710(12) | W9-O24  | 1.921(12) | W16-O39 | 1.721(11) |
| W3-O59 | 1.887(11) | W9-O60  | 1.924(11) | W16-O36 | 1.862(11) |
| W3-O42 | 1.902(12) | W9-O61  | 2.376(10) | W16-O20 | 1.876(11) |
| W3-O31 | 1.908(11) | W10-O45 | 1.709(11) | W16-O51 | 1.922(11) |
| W3-O41 | 1.926(12) | W10-O28 | 1.883(11) | W16-O30 | 1.954(11) |

|        |           |         |           |         |           |
|--------|-----------|---------|-----------|---------|-----------|
| W3-O53 | 2.377(10) | W10-O2  | 1.887(10) | W16-O4  | 2.356(11) |
| W4-O17 | 1.709(12) | W10-O16 | 1.935(11) | W17-O57 | 1.708(13) |
| W4-O6  | 1.874(12) | W10-O37 | 1.940(10) | W17-O30 | 1.897(12) |
| W4-O60 | 1.898(11) | W10-O9  | 2.337(11) | W17-O16 | 1.904(11) |
| W4-O52 | 1.916(12) | W11-O13 | 1.704(12) | W17-O14 | 1.914(11) |
| W4-O33 | 1.928(12) | W11-O18 | 1.863(12) | W17-O32 | 1.934(11) |
| W4-O61 | 2.353(10) | W11-O52 | 1.880(12) | W17-O9  | 2.390(11) |
| W5-O35 | 1.697(12) | W11-O47 | 1.938(11) | W18-O55 | 1.682(11) |
| W5-O14 | 1.901(11) | W11-O31 | 1.946(11) | W18-O47 | 1.869(11) |
| W5-O5  | 1.918(12) | W11-O53 | 2.377(10) | W18-O33 | 1.887(12) |
| W5-O46 | 1.919(11) | W12-O56 | 1.702(11) | W18-O23 | 1.938(12) |
| W5-O36 | 1.926(11) | W12-O58 | 1.878(11) | W18-O49 | 1.970(11) |
| W5-O44 | 2.376(10) | W12-O1  | 1.900(11) | W18-O10 | 2.376(11) |
| W6-O12 | 1.705(11) | W12-O18 | 1.923(12) | P1-O4   | 1.525(11) |
| W6-O32 | 1.894(12) | W12-O19 | 1.925(11) | P1-O48  | 1.526(12) |
| W6-O22 | 1.894(12) | W12-O48 | 2.381(11) | P1-O44  | 1.547(10) |
| W6-O37 | 1.906(10) | W13-O15 | 1.710(11) | P1-O9   | 1.594(12) |
| W6-O1  | 1.919(10) | W13-O5  | 1.884(12) | P2-O53  | 1.512(11) |
| W6-O9  | 2.390(10) | W13-O21 | 1.896(11) | P2-O8   | 1.531(11) |
| W7-O40 | 1.707(11) | W13-O11 | 1.911(12) | P2-O61  | 1.539(11) |
| W7-O3  | 1.881(12) | W13-O50 | 1.969(11) | P2-O10  | 1.564(11) |
| W7-O46 | 1.887(12) | W13-O8  | 2.377(10) |         |           |

| Bond       | Angle(°) | Bond        | Angle(°) | Bond        | Angle(°) |
|------------|----------|-------------|----------|-------------|----------|
| O43-W1-O51 | 100.2(5) | O40-W7-O44  | 174.4(5) | O54-W14-O59 | 84.9(5)  |
| O43-W1-O6  | 98.1(5)  | O46-W7-O44  | 73.6(4)  | O54-W14-O23 | 155.9(5) |
| O51-W1-O58 | 157.2(4) | O42-W8-O11  | 157.2(5) | O59-W14-O23 | 87.6(5)  |
| O6-W1-O22  | 163.8(5) | O42-W8-O54  | 86.0(5)  | O25-W14-O10 | 171.5(5) |
| O7-W2-O41  | 100.8(6) | O3-W8-O54   | 164.9(5) | O50-W15-O24 | 86.5(5)  |
| O7-W2-O19  | 99.3(6)  | O11-W8-O8   | 73.5(4)  | O24-W15-O26 | 157.3(5) |
| O19-W2-O62 | 157.7(5) | O21-W9-O24  | 85.5(5)  | O26-W15-O49 | 86.3(5)  |
| O41-W2-O2  | 176.0(5) | O20-W9-O24  | 162.5(5) | O34-W15-O10 | 168.0(5) |
| O38-W3-O59 | 97.4(5)  | O21-W9-O60  | 156.9(5) | O20-W16-O30 | 163.9(5) |
| O38-W3-O42 | 102.2(5) | O24-W9-O61  | 81.5(4)  | O39-W16-O4  | 171.7(5) |
| O42-W3-O31 | 157.4(5) | O28-W10-O37 | 158.2(5) | O20-W16-O4  | 83.7(4)  |
| O59-W3-O41 | 163.6(5) | O45-W10-O9  | 170.6(5) | O51-W16-O4  | 72.9(4)  |
| O17-W4-O6  | 99.1(6)  | O28-W10-O9  | 85.1(4)  | O30-W17-O16 | 155.5(5) |
| O17-W4-O60 | 99.8(6)  | O16-W10-O9  | 72.9(4)  | O16-W17-O32 | 87.3(5)  |
| O60-W4-O52 | 157.5(5) | O18-W11-O47 | 164.1(5) | O57-W17-O9  | 170.8(5) |
| O6-W4-O33  | 163.7(5) | O47-W11-O31 | 87.5(5)  | O14-W17-O9  | 84.1(4)  |
| O14-W5-O5  | 162.8(5) | O13-W11-O53 | 172.1(5) | O47-W18-O49 | 157.1(5) |
| O14-W5-O36 | 85.8(5)  | O52-W11-O53 | 84.3(4)  | O33-W18-O49 | 88.8(5)  |

|            |          |             |           |             |          |
|------------|----------|-------------|-----------|-------------|----------|
| O5-W5-O36  | 87.5(5)  | O58-W12-O18 | 87.1(5)   | O55-W18-O10 | 168.0(5) |
| O35-W5-O44 | 173.5(5) | O1-W12-O18  | 163.8(50) | O23-W18-O10 | 73.3(4)  |
| O32-W6-O22 | 88.2(5)  | O56-W12-O48 | 173.8(5)  | O4-P1-O48   | 112.0(6) |
| O32-W6-O1  | 156.9(4) | O19-W12-O48 | 72.7(4)   | O48-P1-O44  | 112.2(6) |
| O12-W6-O9  | 171.9(5) | O5-W13-O50  | 162.3(4)  | O4-P1-O9    | 106.7(6) |
| O37-W6-O9  | 72.5(4)  | O21-W13-O50 | 83.2(5)   | O53-P2-O8   | 112.3(6) |
| O3-W7-O62  | 88.9(5)  | O15-W13-O8  | 173.4(5)  | O53-P2-O61  | 111.5(6) |
| O3-W7-O28  | 164.1(5) | O11-W13-O8  | 72.9(4)   | O8-P2-O10   | 106.1(6) |

**Table S4** Hydrogen bonds for compound **2**

| D-H...A          | d(D-H) | d(H...A) | d(D...A)  | <(DHA) |
|------------------|--------|----------|-----------|--------|
| N1-H1A...O45#1   | 0.86   | 1.99     | 2.82(2)   | 161.7  |
| N2-H2A...O39#2   | 0.86   | 2.17     | 2.918(19) | 145.9  |
| N2-H2A...O27     | 0.86   | 2.39     | 2.903(19) | 118.7  |
| N3-H3B...O8W     | 0.86   | 2.45     | 3.14(3)   | 137.9  |
| N4-H4B...O39#2   | 0.86   | 2.24     | 2.94(2)   | 138.2  |
| N4-H4B...O15     | 0.86   | 2.48     | 3.00(12)  | 119.8  |
| N6-H6B...O1W#2   | 0.86   | 2.10     | 2.92(2)   | 158.0  |
| N6-H6B...O29#2   | 0.86   | 2.56     | 3.06(2)   | 117.9  |
| N8-H8A...O1W#2   | 0.86   | 2.02     | 2.84(2)   | 160.9  |
| N9-H9B...O3W     | 0.86   | 1.94     | 2.79(2)   | 172.8  |
| N10-H10B...O49   | 0.86   | 1.88     | 2.732(19) | 168.8  |
| N11-H11B...O3W   | 0.86   | 2.24     | 3.06(3)   | 159.6  |
| N12-H12B...O23   | 0.86   | 2.02     | 2.82(2)   | 154.3  |
| N13-H13A...O5W   | 0.86   | 2.20     | 3.00(3)   | 154.0  |
| N13-H13A...O55#3 | 0.86   | 2.38     | 2.90(2)   | 119.0  |
| N14-H14A...O1W   | 0.86   | 1.86     | 2.71(2)   | 168.7  |
| N15-H15B...O5W   | 0.86   | 1.85     | 2.70(3)   | 168.4  |
| N16-H16B...O1W   | 0.86   | 2.21     | 3.01(3)   | 154.9  |
| N16-H16B...O56#4 | 0.86   | 2.56     | 3.06(3)   | 118.4  |
| N17-H17B...O7W   | 0.86   | 2.16     | 2.94(3)   | 150.1  |
| N18-H18B...O2W   | 0.86   | 1.94     | 2.777(19) | 164.0  |
| N19-H19A...O7W   | 0.86   | 2.11     | 2.87(3)   | 147.8  |
| N19-H19A...O7W#5 | 0.86   | 2.55     | 3.04(3)   | 116.9  |
| N20-H20A...O2W   | 0.86   | 2.05     | 2.87(3)   | 159.2  |
| N21-H21B...O4W   | 0.86   | 2.22     | 3.01(3)   | 151.1  |
| N21-H22B...O13   | 0.86   | 2.32     | 2.84(2)   | 119.5  |
| N23-H23B...O4W   | 0.86   | 1.91     | 2.75(3)   | 166.1  |

Symmetry transformations used to generate equivalent atoms: #1  $x+1, y-1, z$ ; #2  $-x+1, -y, -z+1$ ; #3  $x, y+1, z$ ; #4  $x+1, y, z$ ; #5  $-x-1, -y+1, -z+1$



### 3. Physical characterizations

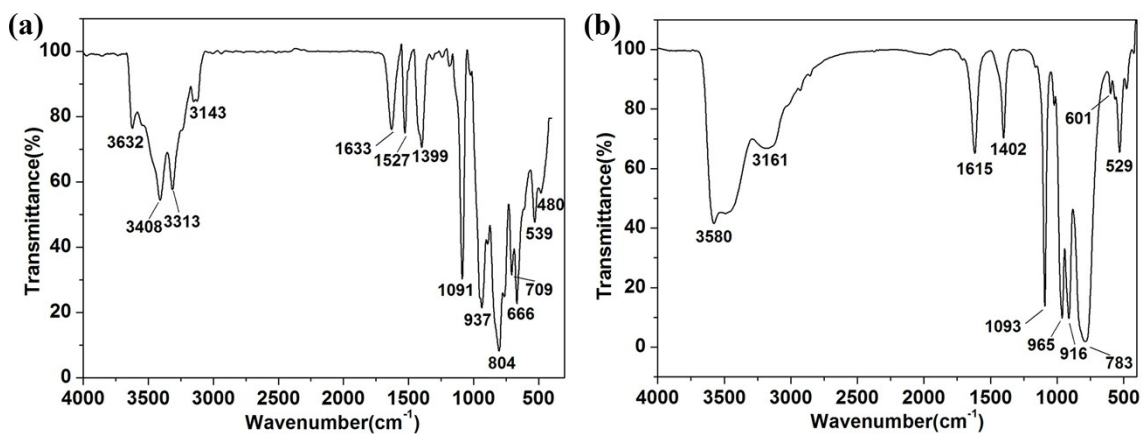

Fig. S4 IR spectra of (a) compound 1 and (b) K-{P<sub>2</sub>W<sub>18</sub>}

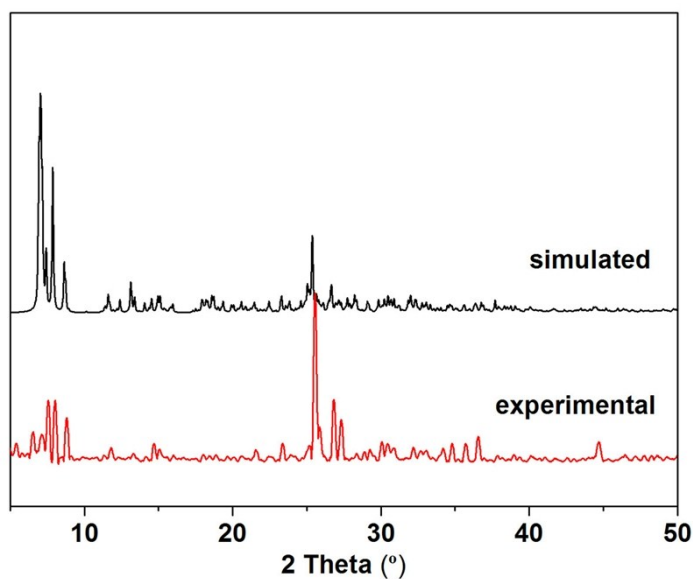

Fig. S5 The simulated and experimental XRD patterns of compound 1

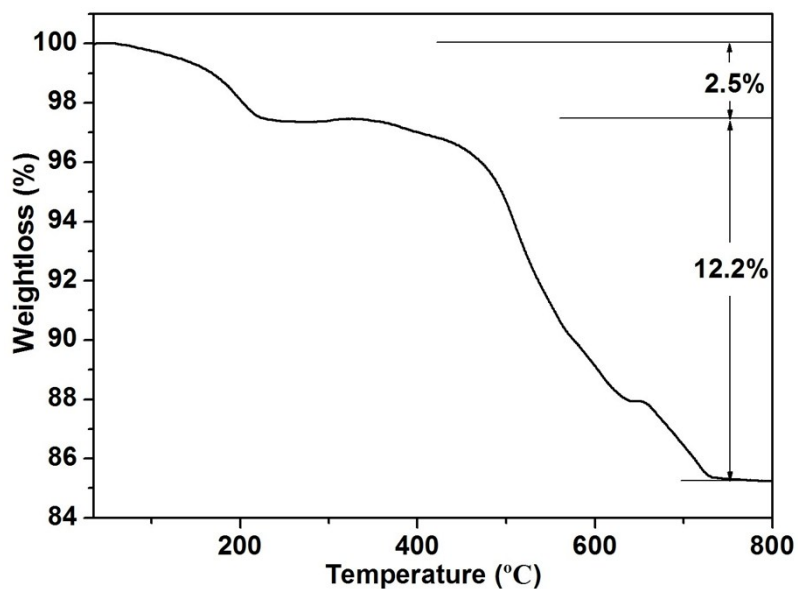

Fig. S6 TG curve of compound 1

#### 4. Enzyme immobilization

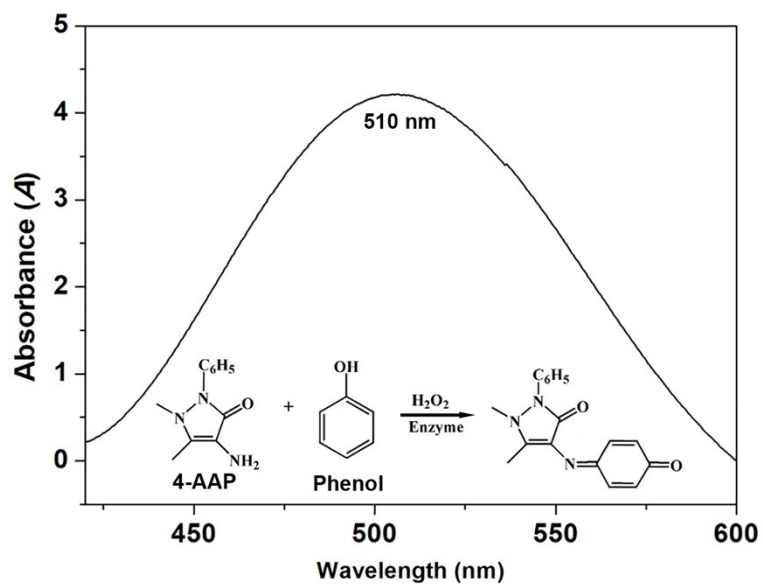

Fig. S7 The UV-vis absorption spectrum of co-oxidation reaction solution of 4-AAP and phenol catalyzed by enzyme

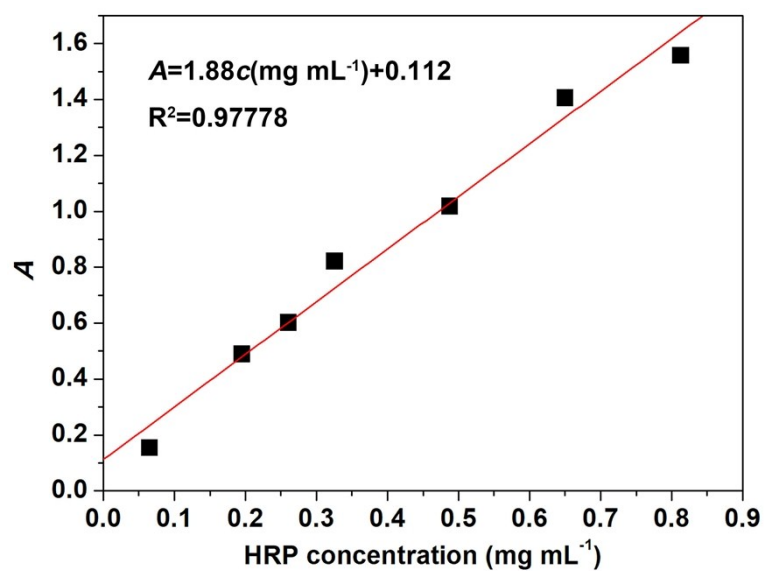

Fig. S8 The standard curve of HRP

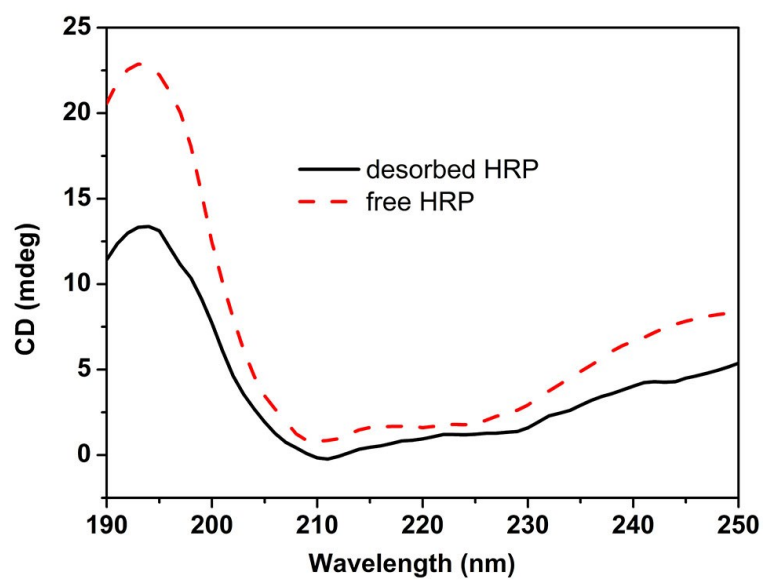

Fig. S9 CD spectra of free HRP and desorbed HRP from HRP/1

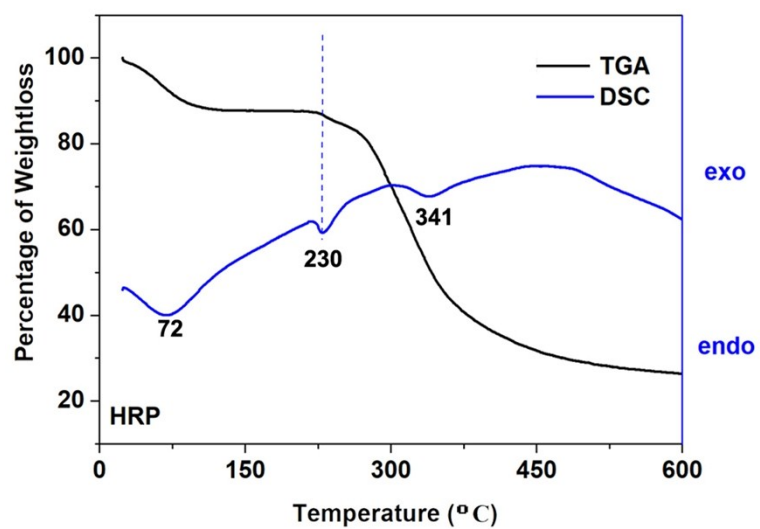

(a)

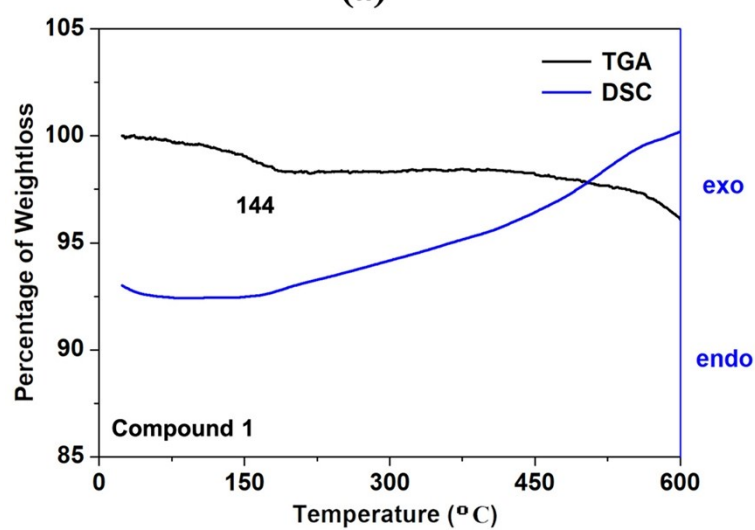

(b)

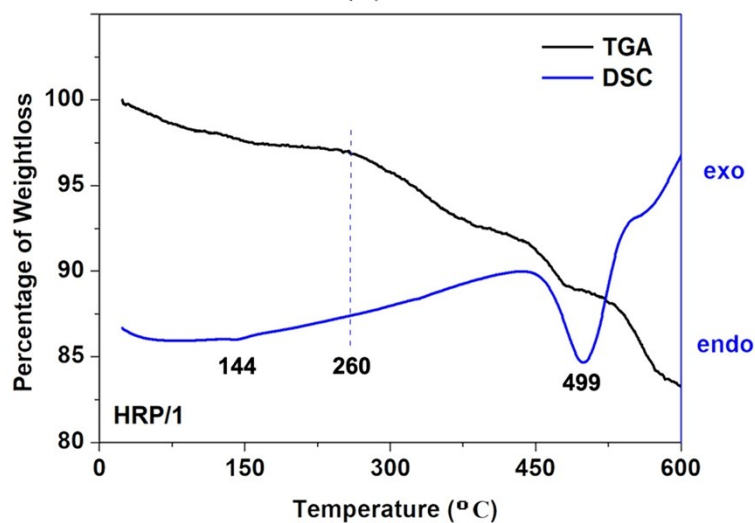

(c)

Fig. S10 The TGA and DSC curves of (a) HRP; (b) compound 1; (c) HRP/1 in nitrogen atmosphere.

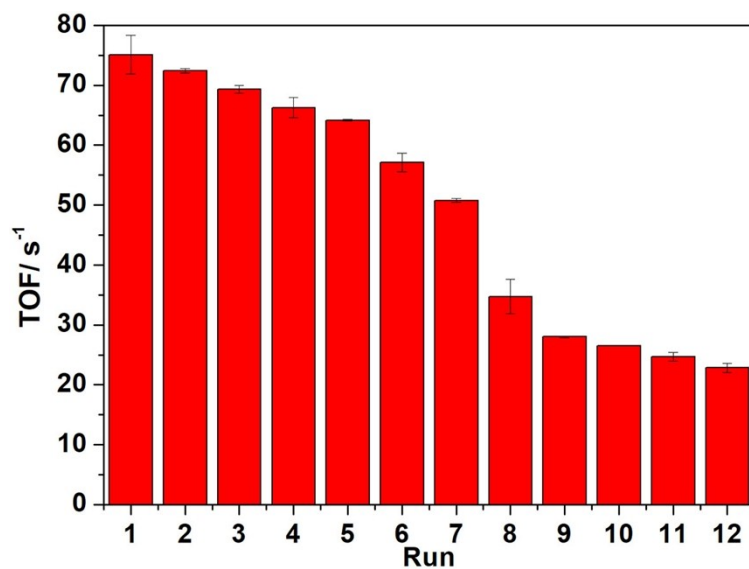

**Fig. S11** The reusability of immobilized enzyme HRP/1 (HRP loading of 90.1 mg g<sup>-1</sup>) as a catalyst for co-oxidation of phenol and 4-AAP at pH 6

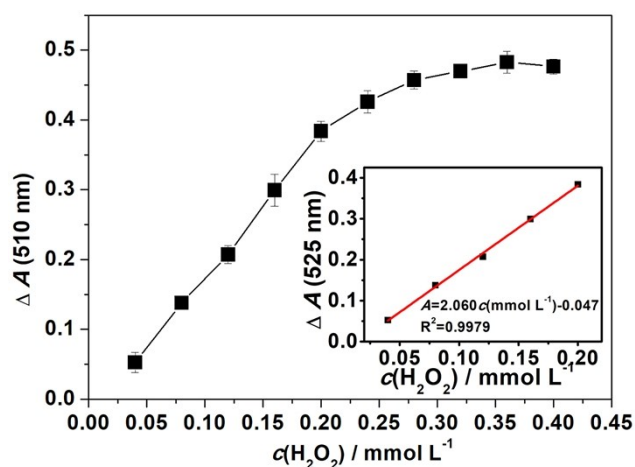

**Fig. S12** The linear calibration plot for H<sub>2</sub>O<sub>2</sub> detection by the reuse of HRP/1 after six recycles as catalyst. ΔA = A (the immobilized HRP, 510 nm) – A (blank, 510 nm). Reaction time is 5 min (Inset: Kinetics curve)
